# Supplementary material for: Intermolecular contacts in the crystal structures of specifically varied halogen and protonic group substituted azines
Source: Royal Society of Chemistry journal article supplement (doi:10.1039/c7ce00548b), 2017-01-01
Supplement: c7ce00548b1.pdf [file c7ce00548b1.pdf]

### Electronic Supplementary Information (ESI)

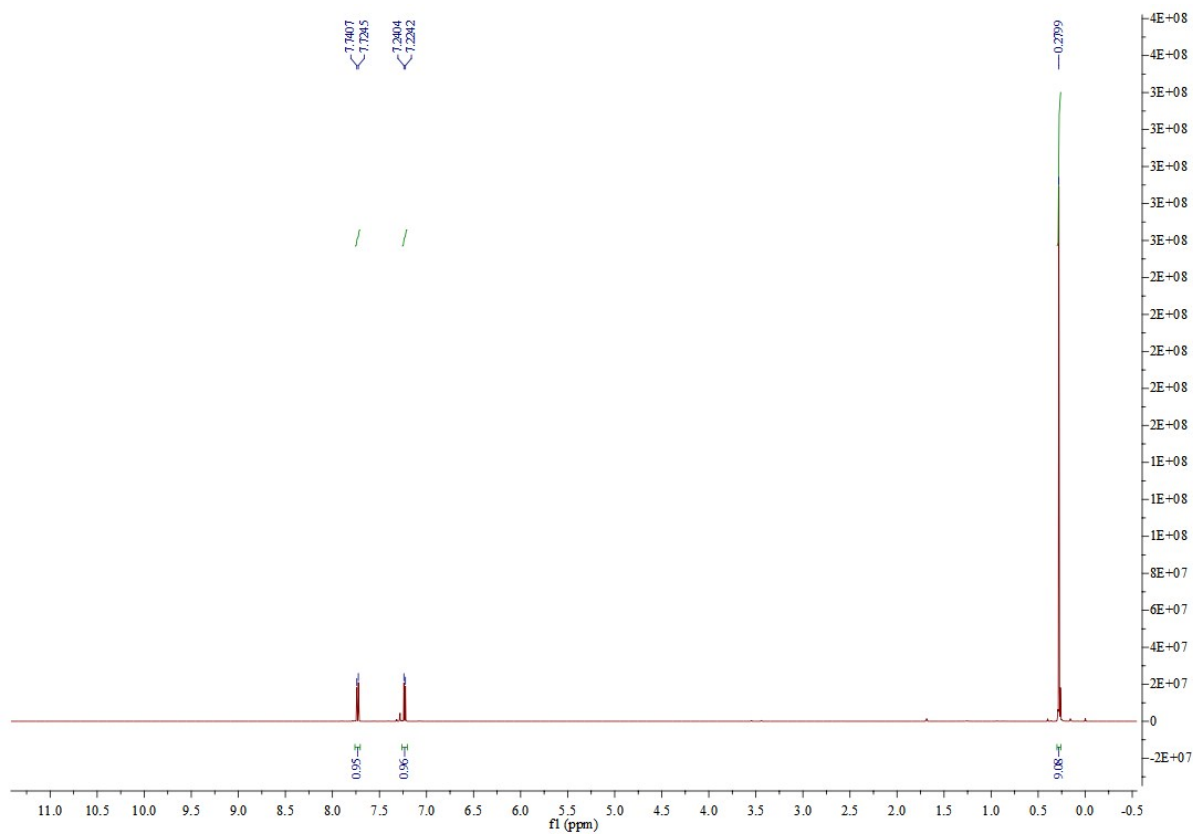

<sup>1</sup>H NMR spectrum (CDCl<sub>3</sub>) of compound **3**.

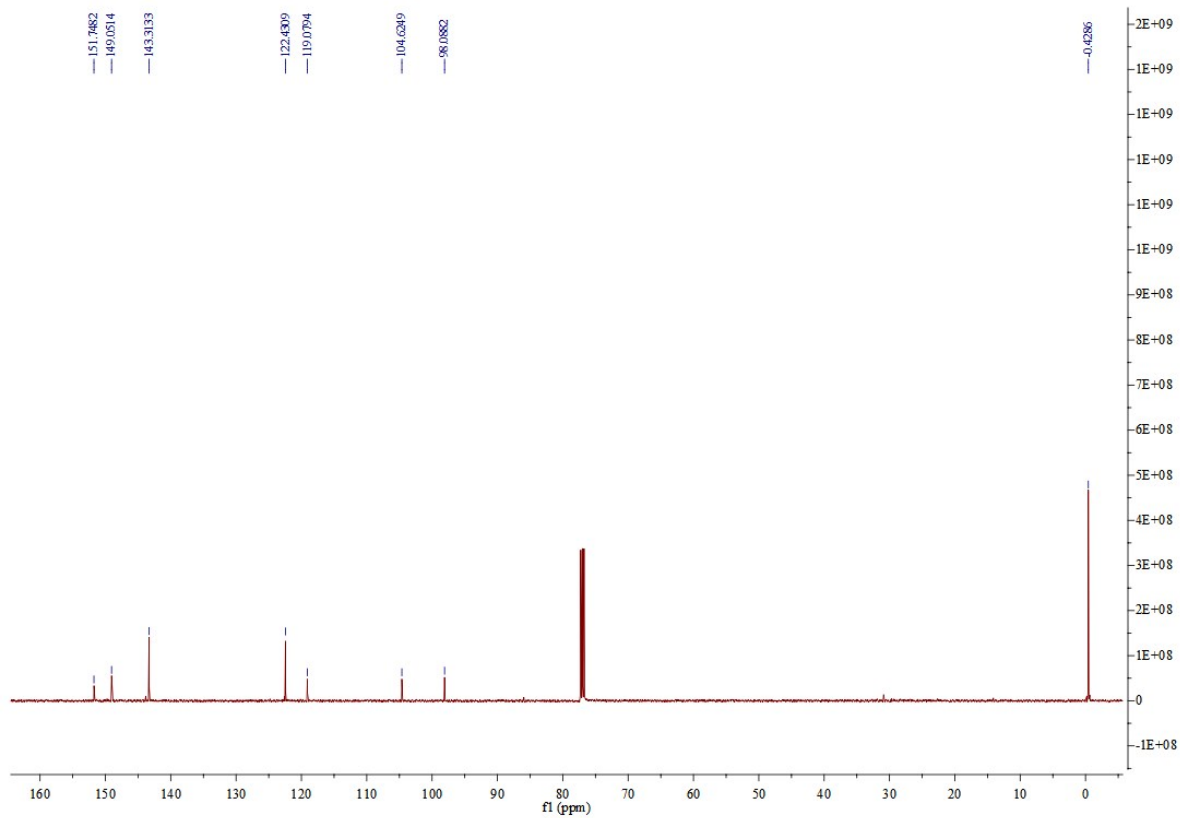

<sup>13</sup>C NMR spectrum (CDCl<sub>3</sub>) of compound **3**.
